# Supplementary material
Source: HighWire-hosted journal article supplement (https://jnm.snmjournals.org/highwire/filestream/94903/field_highwire_adjunct_files/0/171371_Supplemental_Data.pdf)
Supplement: 171371_Supplemental_Data.pdf [file 171371_Supplemental_Data.pdf]

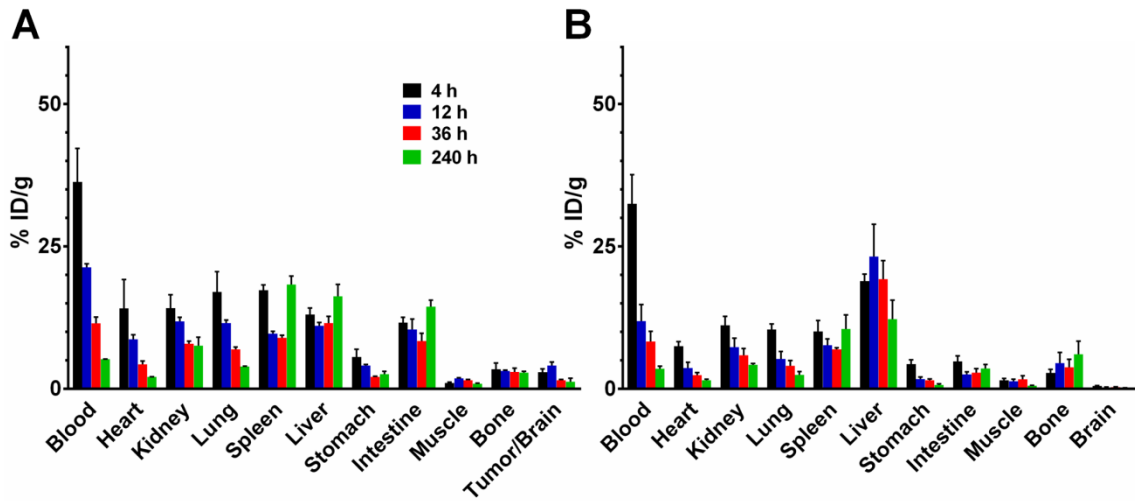

**Supplemental Figure 1** Tissue biodistribution of A)  $^{225}\text{Ac}$ -isotope in glioblastoma-bearing mice and B)  $^{225}\text{Ac}$ -isotope in naïve mice. Shown is the tissue uptake in %ID/g at different time points. Reported values are means  $\pm$  SEM.

**Supplemental Table 1** Absorbed dose calculations for  $^{225}\text{Ac-E4G10}$  at day 10 after anti-vascular therapy in naïve mice and glioblastoma-bearing mice. Dose estimates are displayed in Gy/MBq (Gy/37 $\mu\text{Ci}$ ).

|                    | <b>Naïve mice</b> |           | <b>Glioblastoma mice</b> |           |
|--------------------|-------------------|-----------|--------------------------|-----------|
|                    | <b>mean</b>       | <b>SD</b> | <b>mean</b>              | <b>SD</b> |
| <b>Blood</b>       | 147               | 30        | 83                       | 20        |
| <b>Heart</b>       | 64                | 14        | 48                       | 8         |
| <b>Kidney</b>      | 160               | 28        | 142                      | 17        |
| <b>Lung</b>        | 78                | 17        | 84                       | 21        |
| <b>Spleen</b>      | 406               | 103       | 846                      | 72        |
| <b>Liver</b>       | 1016              | 132       | 1577                     | 535       |
| <b>Stomach</b>     | 33                | 8         | 43                       | 11        |
| <b>Intestine</b>   | 80                | 20        | 263                      | 67        |
| <b>Muscle</b>      | 26                | 5         | 22                       | 4         |
| <b>Bone</b>        | 366               | 151       | 244                      | 112       |
| <b>Brain</b>       | 3.1               | 0.8       | N/D                      | N/D       |
| <b>Tumor/Brain</b> | N/D               | N/D       | 24.0                     | 4.8       |
